# Supplementary material for: Effects of Deacetylase Inhibition on the Activation of the Antioxidant Response and Aerobic Metabolism in Cellular Models of Fanconi Anemia
Source: MDPI journal article supplement (doi:10.3390/antiox12051100), 2023-05-15
Supplement: s1 [file s1]

Figure S1

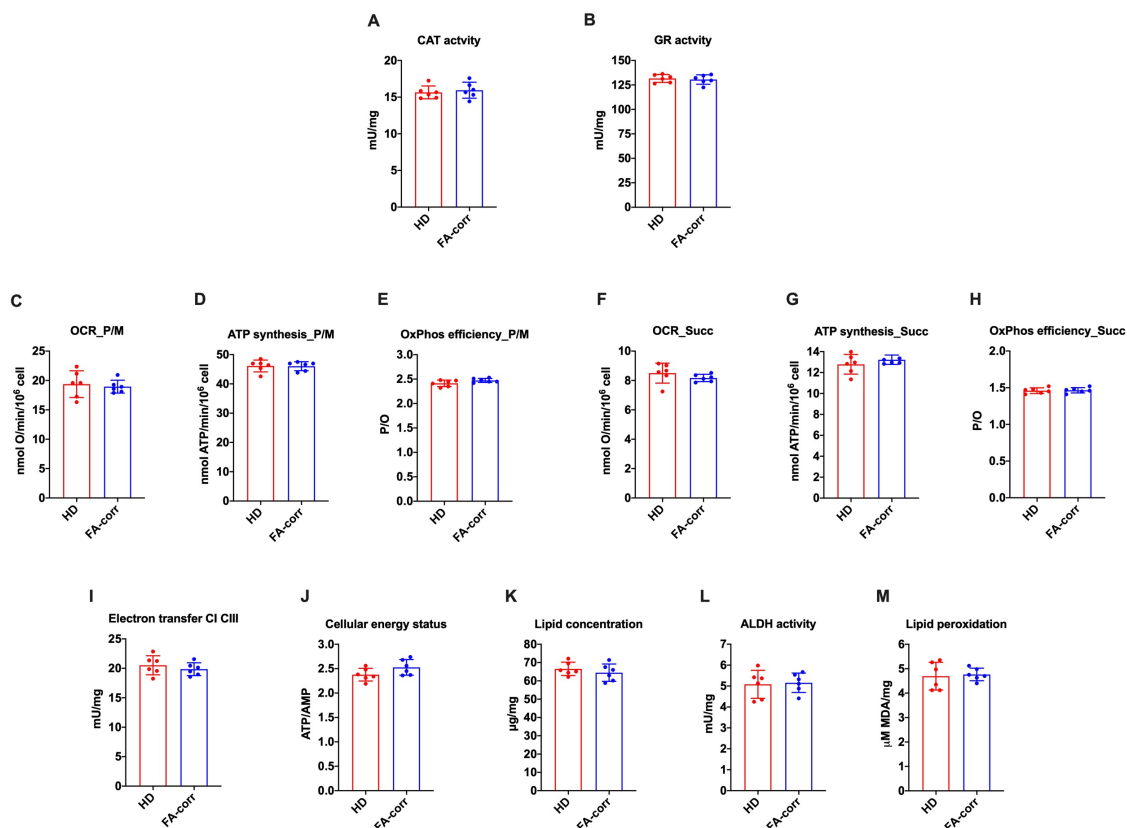

**Figure S1: Comparison of biochemical activities in the healthy donor-derived and FA-corr lymphoblast cell lines.**

The following biochemical activities have been tested in the healthy donor (HD) and FA-corr lymphoblast cell lines. (A) Catalase (CAT) activity; (B) Glutathione reductase (GR) activity; (C) Oxygen Consumption Rate (OCR) in the presence of pyruvate plus malate (P/M); (D) ATP synthesis through F<sub>0</sub>F<sub>1</sub> ATP synthase in the presence of P/M; (E) P/O ratio as an OxPhos efficiency marker in the presence of P/M; (F) Oxygen Consumption Rate (OCR) in the presence of succinate (Succ); (G) ATP synthesis through F<sub>0</sub>F<sub>1</sub> ATP synthase in the presence of Succ; (H) P/O ratio as an OxPhos efficiency marker in the presence of Succ; (I) Electron transfer between complexes I and III; (J) ATP/AMP ratio as a cellular energy status marker; (K) Cellular lipid concentration; (L) Aldehyde dehydrogenase (ALDH) activity; (M) Malondialdehyde (MDA) intracellular concentration, as a lipid peroxidation marker. Data are reported as mean  $\pm$  SD, and each graph is representative of 6 independent experiments. Statistical significance was tested with a one-way ANOVA, and no significant differences have been observed.

Figure S2

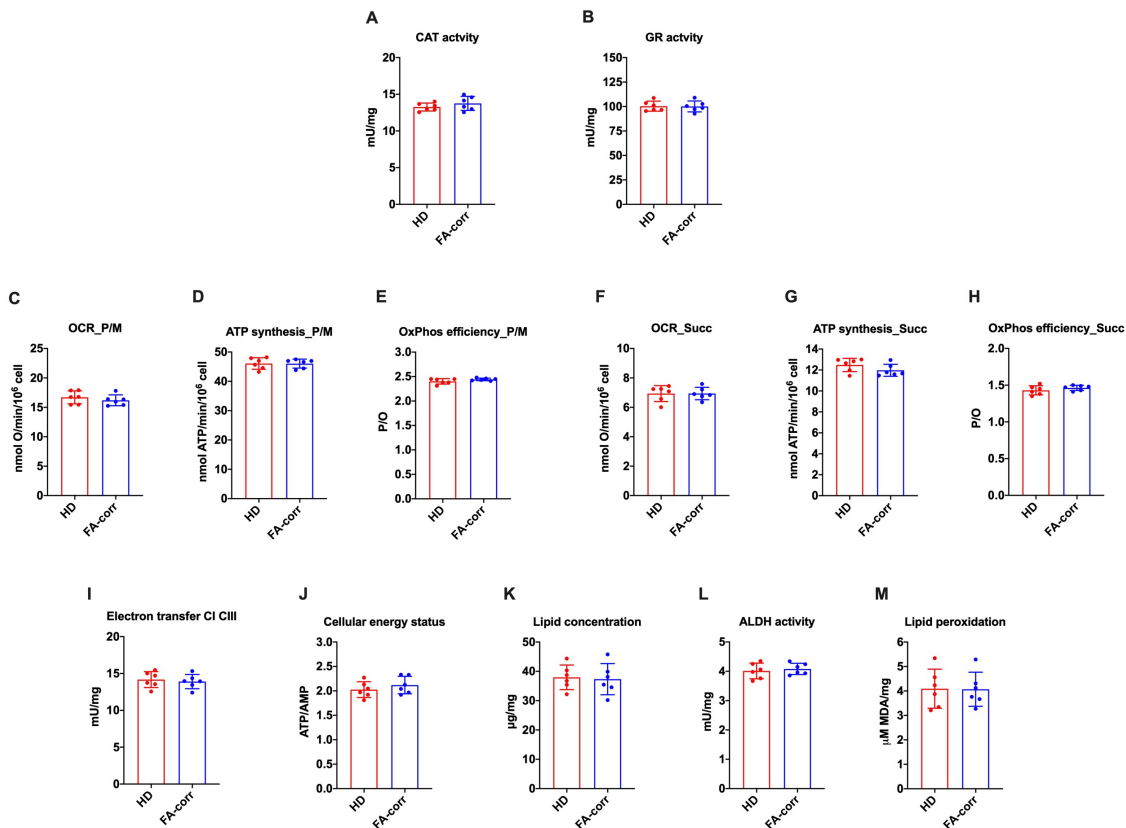

**Figure S2: Comparison of biochemical activities in the healthy donor-derived and FA-corr primary fibroblasts.**

The following biochemical activities have been tested in the healthy donor (HD) and FA-corr primary fibroblasts. (A) Catalase (CAT) activity; (B) Glutathione reductase (GR) activity; (C) Oxygen Consumption Rate (OCR) in the presence of pyruvate plus malate (P/M); (D) ATP synthesis through F<sub>0</sub>F<sub>1</sub> ATP synthase in the presence of P/M; (E) P/O ratio as an OxPhos efficiency marker in the presence of P/M; (F) Oxygen Consumption Rate (OCR) in the presence of succinate (Succ); (G) ATP synthesis through F<sub>0</sub>F<sub>1</sub> ATP synthase in the presence of Succ; (H) P/O ratio as an OxPhos efficiency marker in the presence of Succ; (I) Electron transfer between complexes I and III; (J) ATP/AMP ratio as a cellular energy status marker; (K) Cellular lipid concentration; (L) Aldehyde dehydrogenase (ALDH) activity; (M) Malondialdehyde (MDA) intracellular concentration, as a lipid peroxidation marker. Data are reported as mean ± SD, and each graph is representative of 6 independent experiments. Statistical significance was tested with a one-way ANOVA, and no significant differences have been observed.

Figure S3

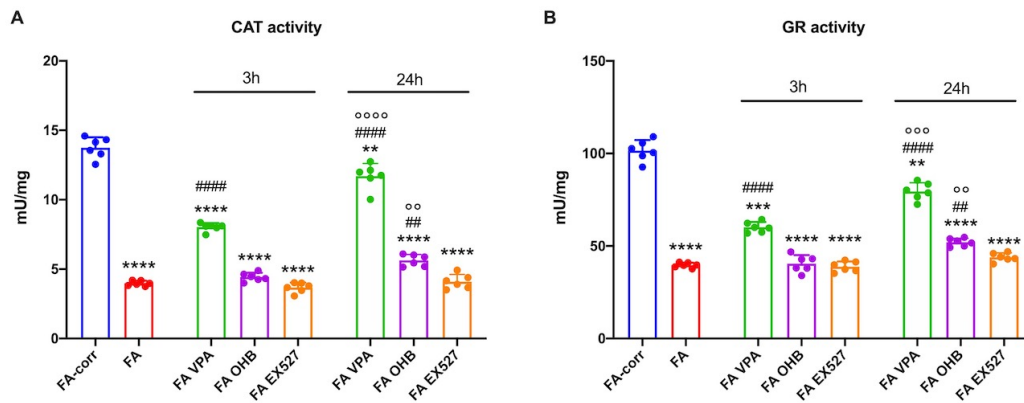

**Figure S3: Modulation of Catalase and Glutathione Reductase expression and activity in FA fibroblasts treated with VPA, OHB, or EX527.**

(A) Catalase (CAT) activity; (B) Glutathione reductase (GR) activity. In each panel, the effects were evaluated in fibroblasts after 3 and 24 hours from VPA, OHB, or EX527 addition. Data are reported as mean  $\pm$  SD, and each graph is representative of 6 independent experiments. Statistical significance was tested with a one-way ANOVA. \*\*, \*\*\* and \*\*\*\* represent a significant difference for  $p < 0.01$ ,  $0.001$ , or  $0.0001$ , respectively, between FA and FA-corr cells used as control. ## and #### represent a significant difference for  $p < 0.01$  or  $0.0001$ , respectively, between untreated and treated FA cells. °°, °°, and °°°° represent a significant difference for  $p < 0.01$ ,  $0.001$ , and  $0.0001$  between the same treatment at 3 and 24 hours.

Figure S4

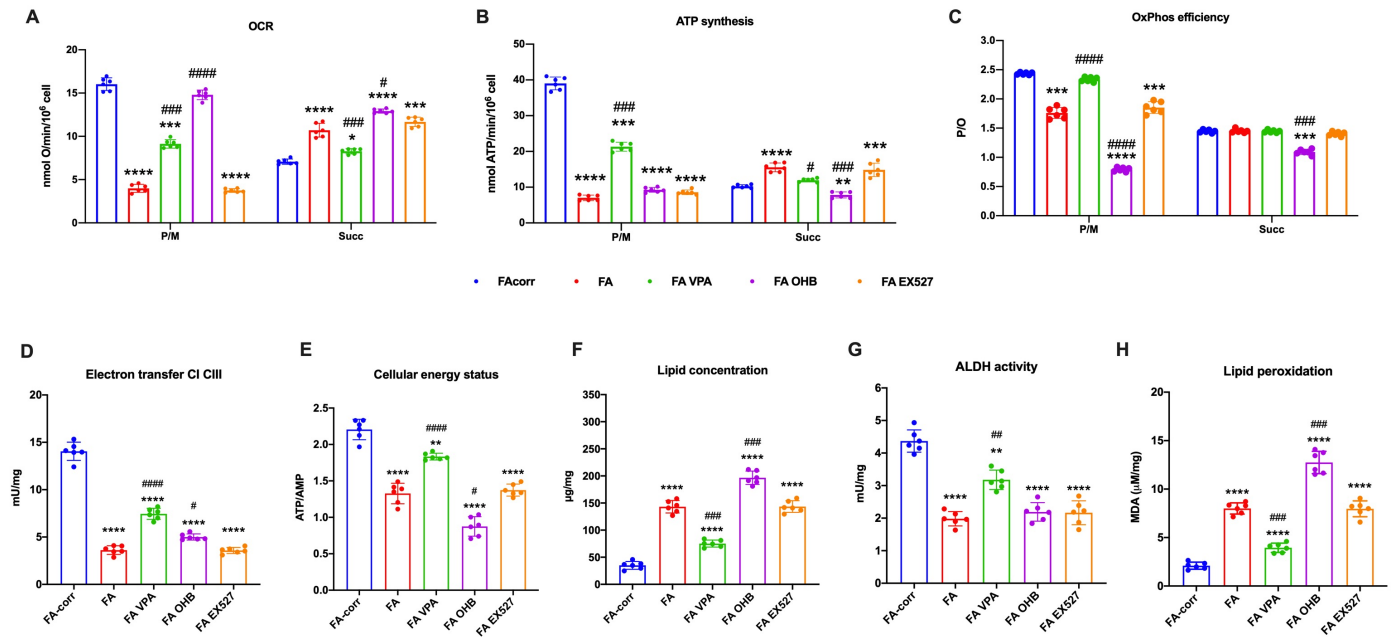

**Figure S4: VPA, OHB, and EX527 effects on energy metabolism parameters and lipid peroxidation in FA fibroblasts**  
 (A) Oxygen Consumption Rate (OCR); (B) ATP synthesis through F<sub>0</sub>F<sub>1</sub> ATP synthase; (C) P/O ratio as an OxPhos efficiency marker. For panels A-C, pyruvate/malate (P/M) and succinate (Succ) have been employed as respiratory substrates. (D) Electron transfer between complexes I and III; (E) ATP/AMP ratio as a cellular energy status marker; (F) Cellular lipid concentration; (G) Aldehyde dehydrogenase (ALDH) activity; (H) Malondialdehyde (MDA) intracellular concentration, as a lipid peroxidation marker. In each panel, the effects were evaluated in fibroblasts after 24 hours from VPA, OHB, or EX527 addition. Data are reported as mean  $\pm$  SD, and each graph is representative of 6 independent experiments. Statistical significance was tested opportunely with a one-way ANOVA or two-way ANOVA. \*, \*\*, \*\*\*, and \*\*\*\* represent a significant difference for  $p < 0.05$ , 0.01, 0.001, or 0.0001, respectively, between FA and FA-corr cells used as control. #, ##, ###, and #### represent a significant difference for  $p < 0.05$ , 0.01, 0.001, or 0.0001, respectively, between untreated and treated FA cells.

Figure S5

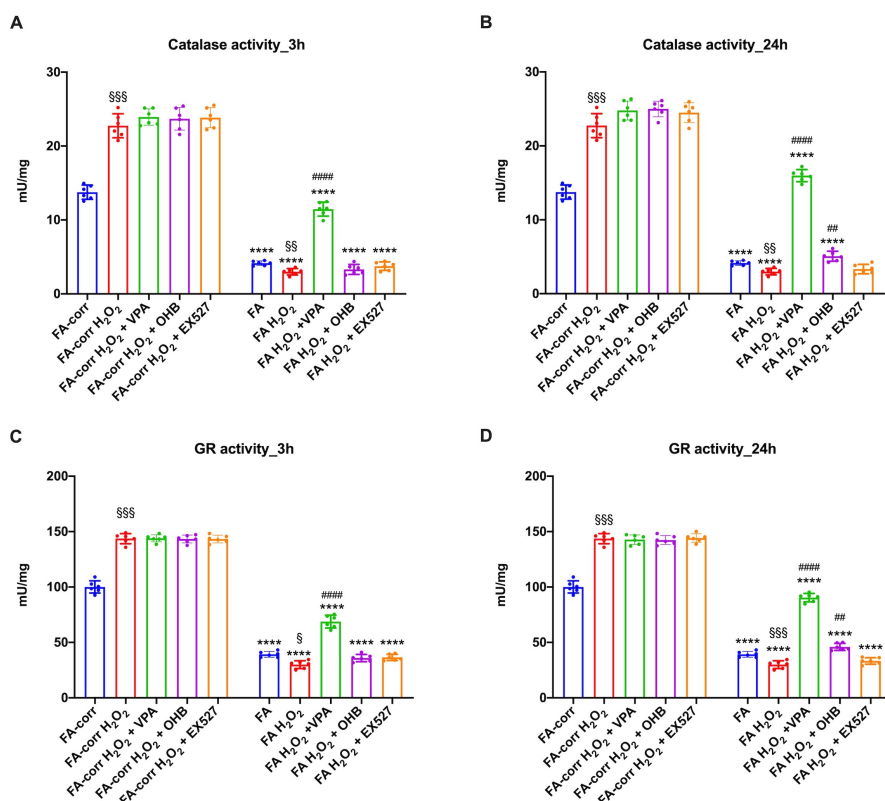

**Figure S5: Modulation of Catalase and Glutathione Reductase expression and activity in FA fibroblasts treated with VPA, OHB, or EX527 after the hydrogen peroxide addition.**

In each graph, 0.5 mM hydrogen peroxide was added to induce oxidative insult. (A) and (B) Catalase (CAT) activity after 3h and 24h from VPA, OHB, or EX527 addition, respectively; (C) and (D) Glutathione reductase (GR) activity after 3h and 24h from VPA, OHB, or EX527 addition, respectively. Data are reported as mean  $\pm$  SD, and each graph is representative of 6 independent experiments. Statistical significance was tested with a one-way ANOVA. \*\*\*\* represents a significant difference for  $p < 0.0001$  between FA and FA-corr cells in the same treatment condition. ## and #### represent a significant difference for  $p < 0.01$  or  $0.0001$ , respectively, between untreated and VPA-, OHB-, or EX527-treated samples. §, §§, and §§§ represents a significant difference for  $p < 0.05$ ,  $0.01$ , or  $0.001$ , respectively, between H<sub>2</sub>O<sub>2</sub>-treated and untreated samples.

Figure S6

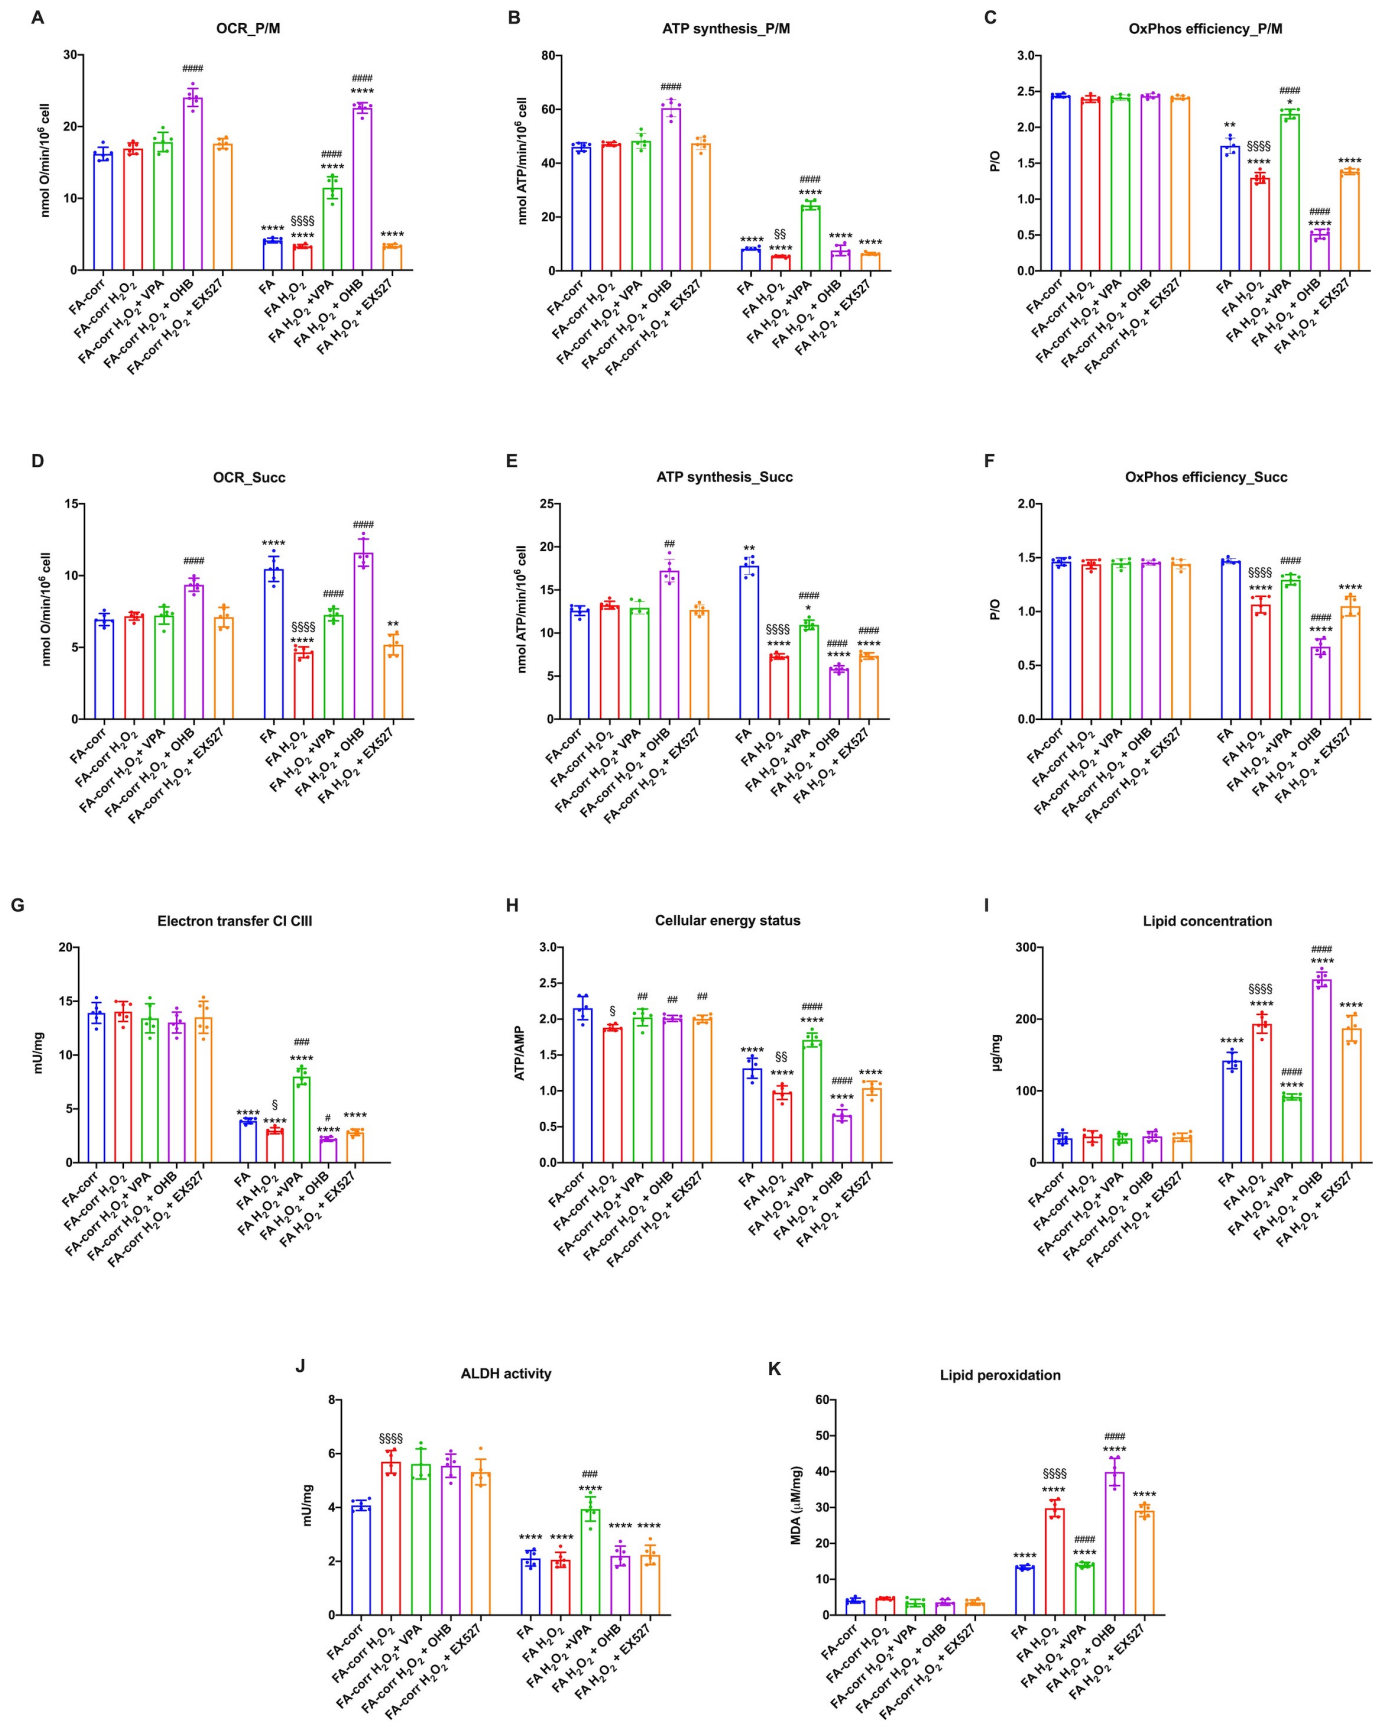

**Figure S6: VPA, OHB, and EX527 effects on energy metabolism parameters and lipid peroxidation in FA fibroblasts after the hydrogen peroxide addition.**

(A) Oxygen Consumption Rate (OCR) in the presence of pyruvate plus malate (P/M); (B) ATP synthesis through  $F_0F_1$  ATP synthase in the presence of P/M; (C) P/O ratio in the presence of P/M as an OxPhos efficiency marker; (D) Oxygen Consumption Rate (OCR) in the presence of succinate (Succ); (E) ATP synthesis through  $F_0F_1$  ATP synthase in the presence of Succ; (F) P/O ratio in the presence of Succ as an OxPhos efficiency marker; (G) Electron transfer between complexes I and III; (H) ATP/AMP ratio as a cellular energy status marker; (I) Cellular lipid concentration; (J) Aldehyde dehydrogenase (ALDH) activity; (K) Malondialdehyde (MDA) intracellular concentration, as a lipid peroxidation marker. In each panel, the effects were evaluated in fibroblasts after 24 hours from VPA, OHB, or EX527 addition. Data are reported as mean  $\pm$  SD, and each graph is representative of 6 independent experiments. Statistical significance was tested opportunistically with a one-way ANOVA or two-way ANOVA. \*, \*\*, and \*\*\*\* represent a significant difference for  $p < 0.05$ ,  $0.01$ , or  $0.0001$ , respectively, between FA and FA-corr cells in the same treatment condition. #, ##, ###, and #### represent a significant difference for  $p < 0.05$ ,  $0.01$ ,  $0.001$ , or  $0.0001$ , respectively, between untreated and VPA-, OHB-, or EX527-treated samples. \$, \$\$, and \$\$\$ represents a significant difference for  $p < 0.05$ ,  $0.01$ , or  $0.0001$ , respectively, between H<sub>2</sub>O<sub>2</sub>-treated and untreated samples.
